# Supplementary material for: Discriminating viscous-creep features (rock glaciers) in mountain permafrost from debris-covered glaciers – a commented test at the Gruben and Yerba Loca sites, Swiss Alps and Chilean Andes
Source: Copernicus journal article supplement (doi:10.5194/tc-18-1669-2024), 2024-04-09
Supplement: Supplementary file 1 [file tc-18-1669-2024-supplement.zip]

Archive with 2 entries (2 files):
- Haeberli et al_Supplement.docx
- tc-18-1669-2024-supplement-title-page.pdf
