# Supplementary material for: Discriminating viscous-creep features (rock glaciers) in mountain permafrost from debris-covered glaciers – a commented test at the Gruben and Yerba Loca sites, Swiss Alps and Chilean Andes
Source: Copernicus journal article supplement (doi:10.5194/tc-18-1669-2024), 2024-04-09
Supplement: Supplementary file 1 [file tc-18-1669-2024-supplement.zip › Haeberli et al_Supplement.docx]

**S1. Preliminary results from recent ERT soundings at Gruben rock glacier and in the former contact zone with the LIA Gruben glacier**


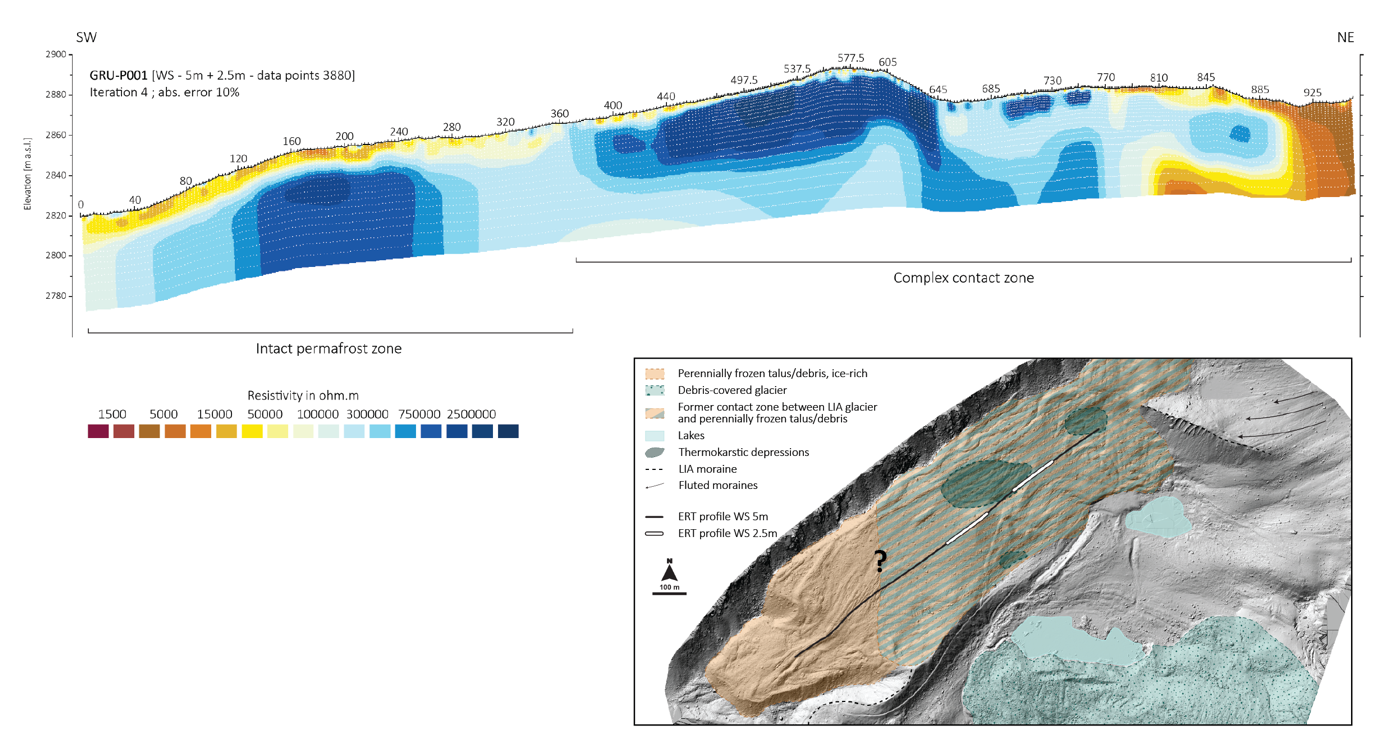


Figure S1: Variable resistivity values in the high kWm range indicate ice-rich but heterogenous frozen talus/debris down to depths of decameters, exceeding the penetration depth of the soundings. Values in the low MWm range point to isolated remains of buried surface ice embedded on top of deep-reaching permafrost. The exact origin of this buried ice is not known; possibilities include dead ice from the orographic right part of the formerly composite LIA glacier or buried avalanche cones from the talus where the flowlines have their starting point. Resistivities in the low kWm range represent non-frozen conditions in the inner forefield of the composite polythermal LIA glacier.

**S2. Kinematics Yerba Loca**

**
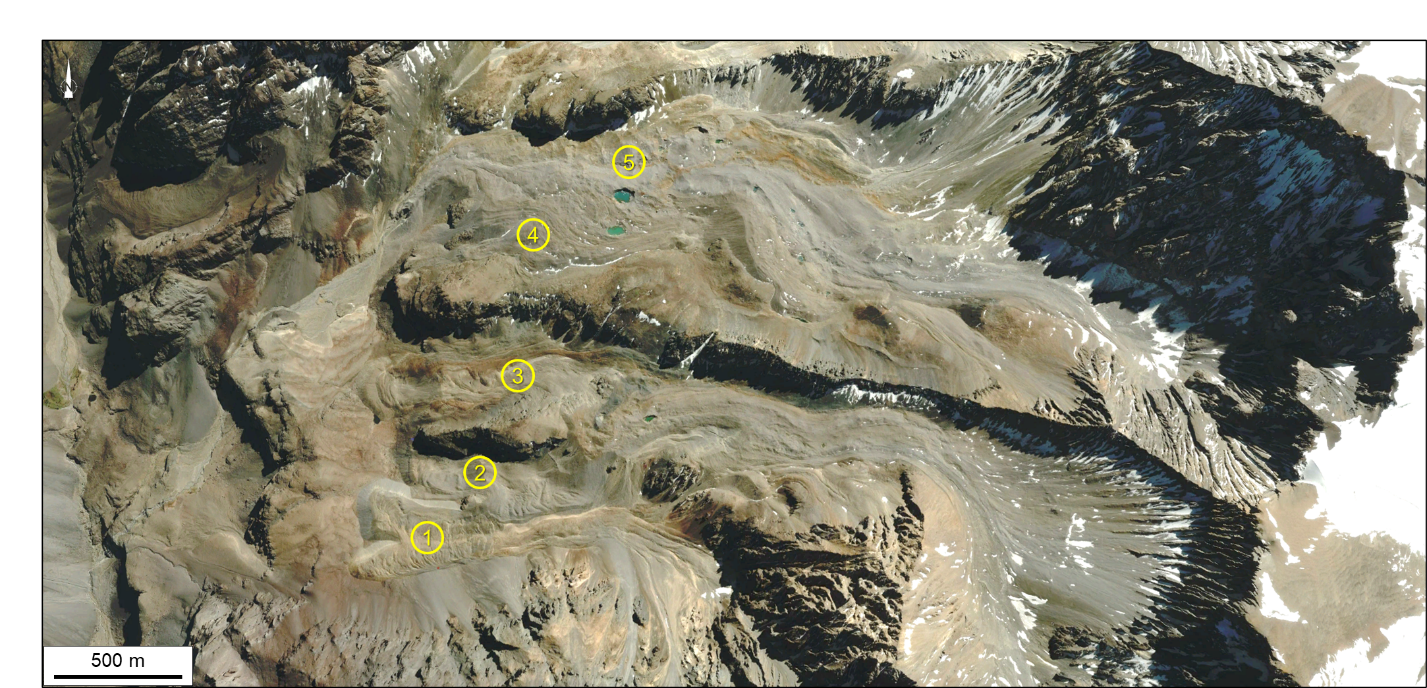
**

Figure S2: Orthoimage of the upper Yerba Loca Valley, Andes of Chile, showing multiple creep phenomena in permafrost with in places remains of buried ice on the west facing slopes. Numbers refer to Figure 5 of the main manuscript. The rock glaciers 1 and 2 shown in the animated supplement Figure Sup.-3. are in the lower section of the image and the complex contact zone with remains of buried surface ice, thermokarst and somewhat diffuse creep phenomena of frozen materials shown with Figure Sup.-4. in the upper section, respectively. Image: © Google Earth.


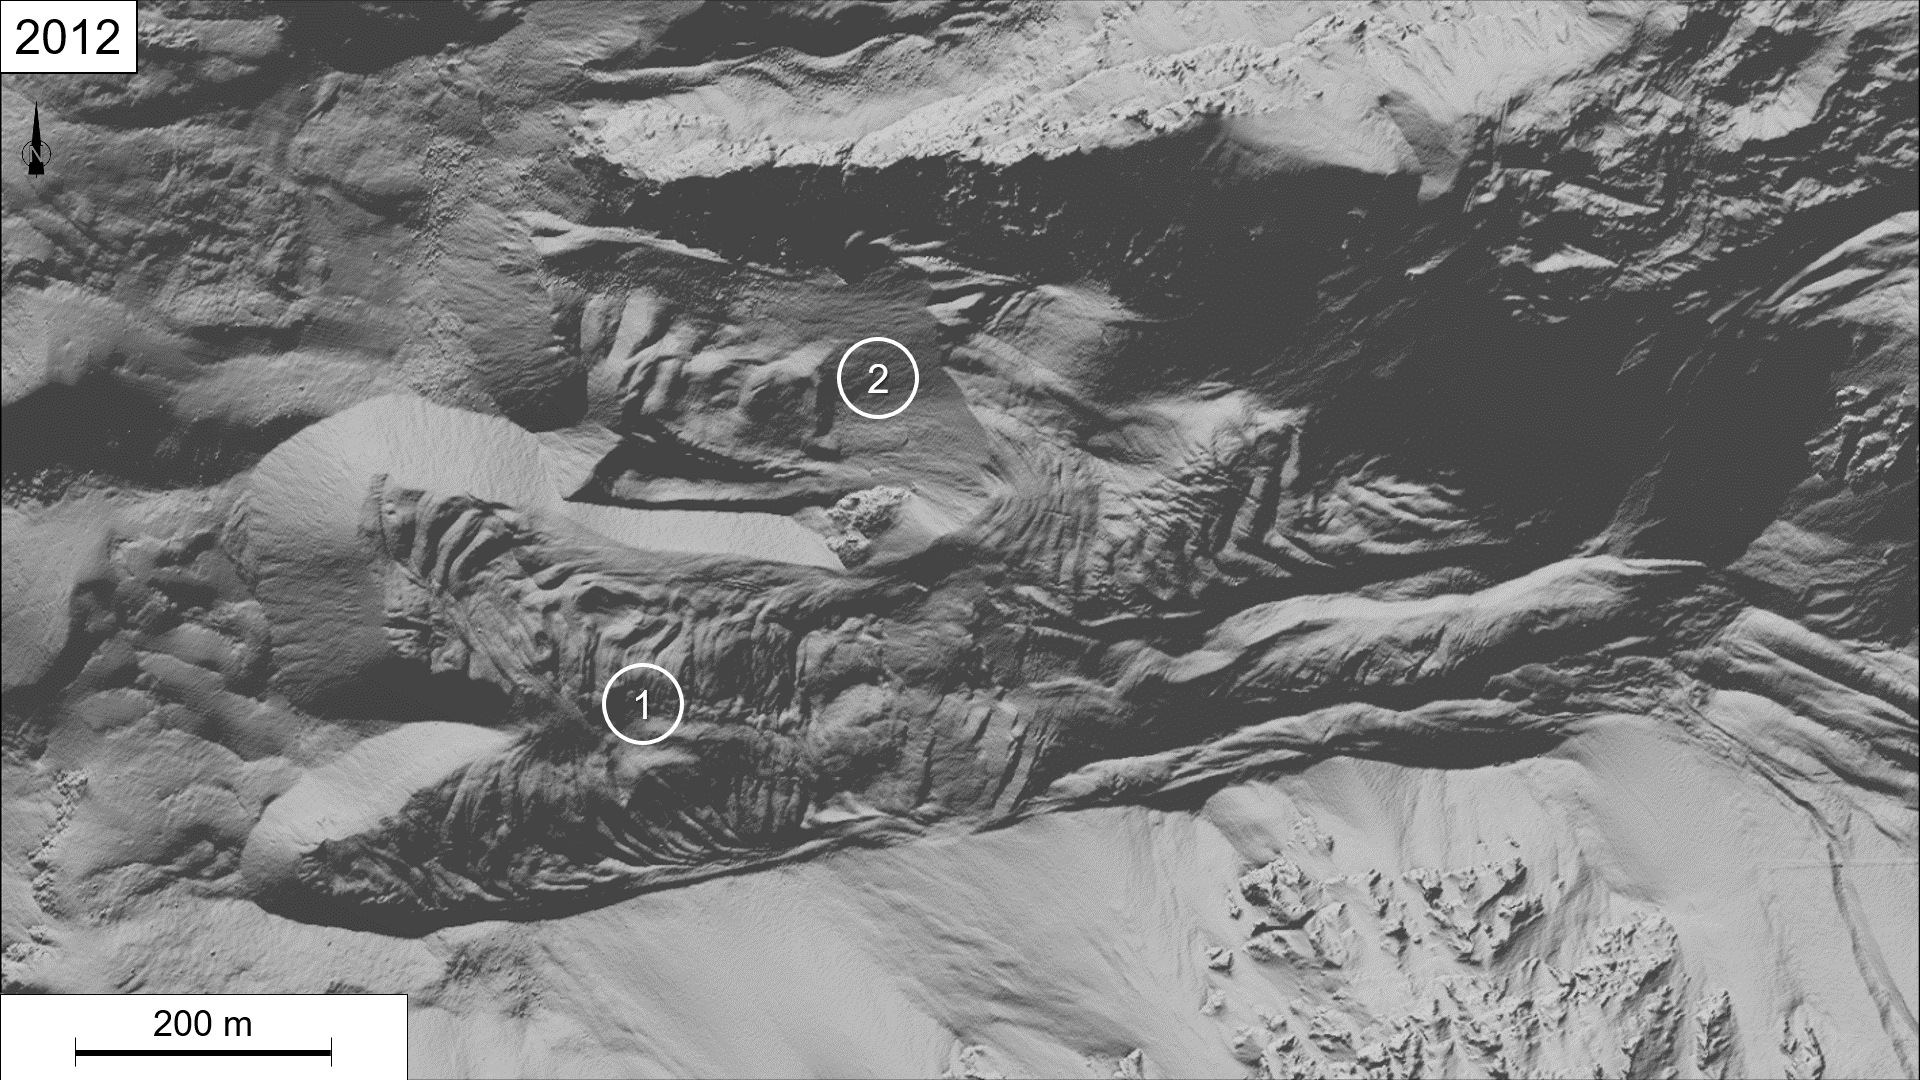


Figure S3: Comparison of 2012 and 2022 aerial lidar showing the uniform/coherent creep dynamics of rock glaciers located in the upper Yerba Loca Valley. Numbers refer to Figure 5 of the main manuscript. Note that the fronts of the rock glaciers 1 and 2 advance integrally, reflecting forward movement of a thick creeping body. At feature 2, the orographic right part of the advancing front overrides coarse blocks of its talus apron and simultaneously delivers new blocks to it, which come down from the lower margin of the rock-glacier surface. Images provided by AAS.

**
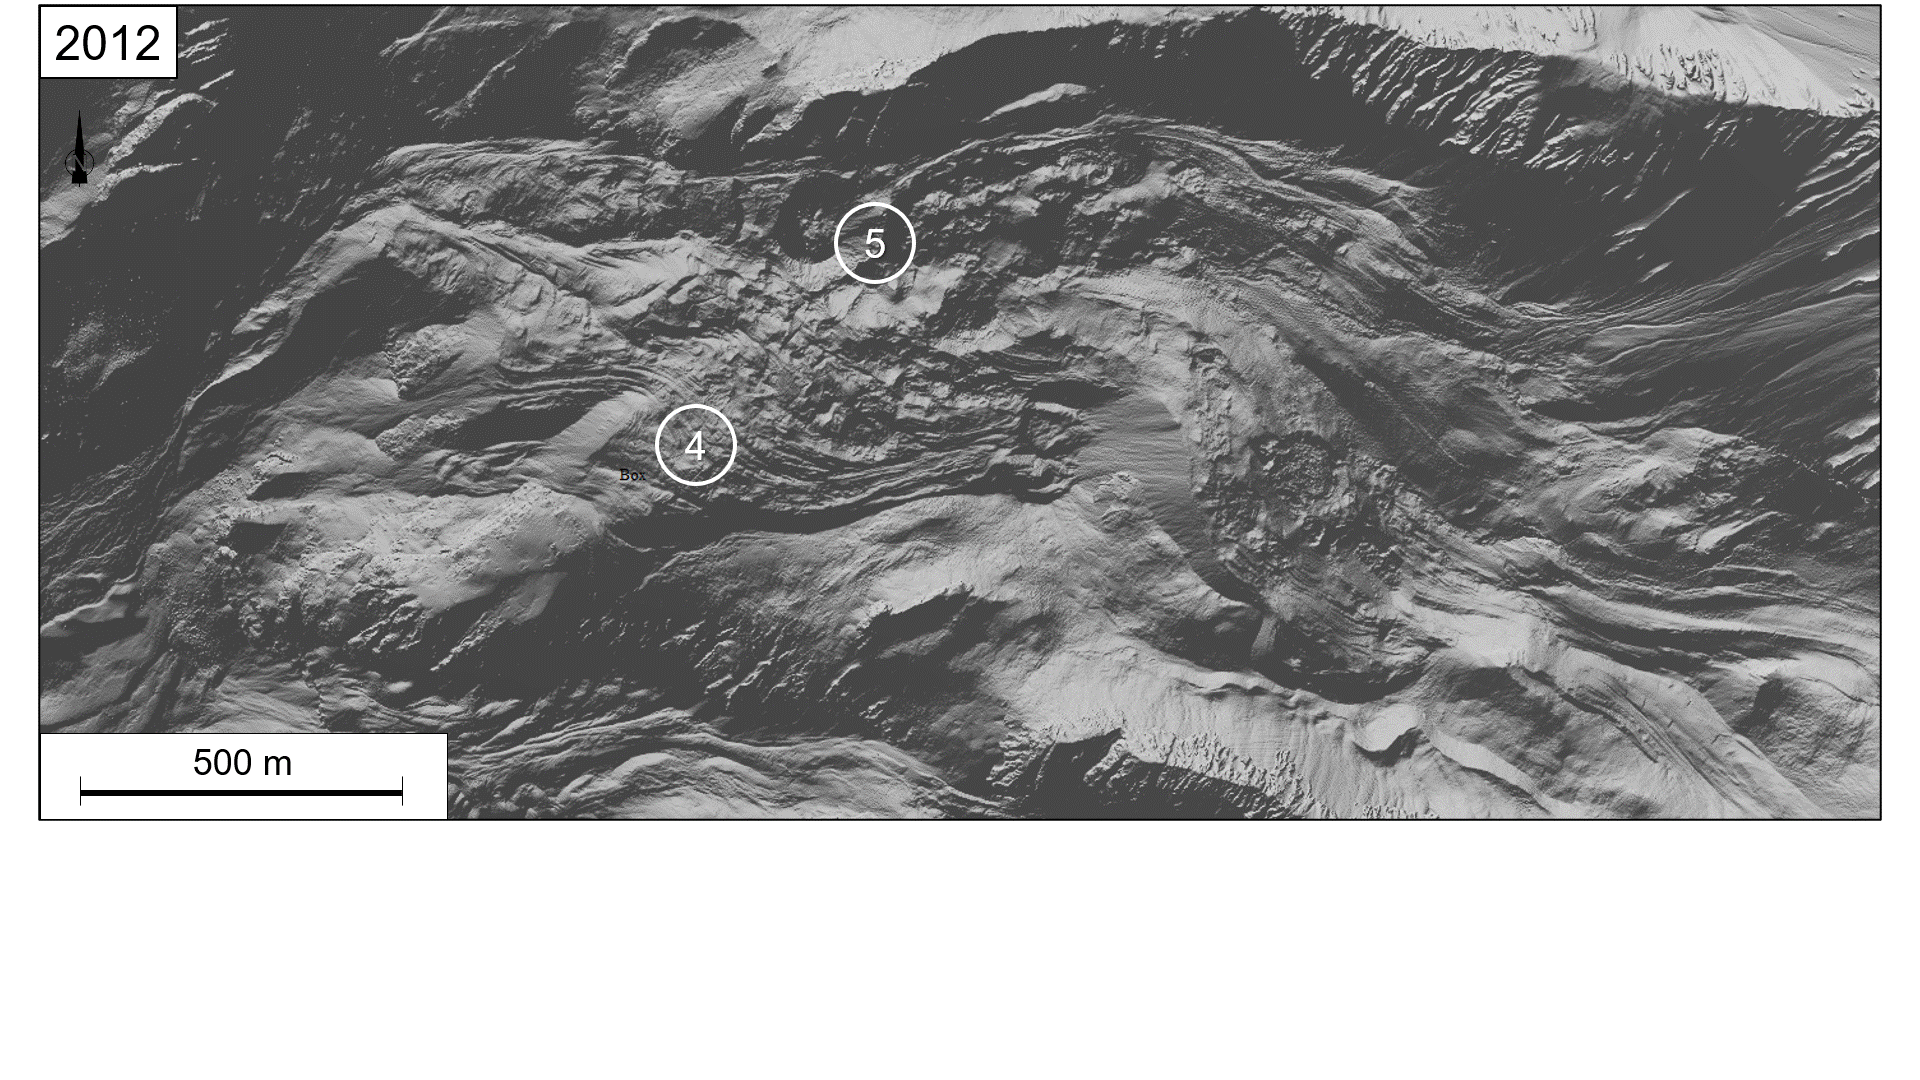
**

Figure S4: Comparison of 2012 and 2022 aerial lidar showing the complex dynamics of permafrost creep with remains of buried ice located in the upper Yerba Loca Valley. The formation of thermokarst can be noted at multiple locations. Numbers refer to Figure 5 of the main manuscript. Images provided by AAS.
