# Supplementary material for: Discriminating viscous-creep features (rock glaciers) in mountain permafrost from debris-covered glaciers – a commented test at the Gruben and Yerba Loca sites, Swiss Alps and Chilean Andes
Source: Copernicus journal article supplement (doi:10.5194/tc-18-1669-2024), 2024-04-09
Supplement: Supplementary file 1 [file tc-18-1669-2024-supplement.zip › tc-18-1669-2024-supplement-title-page.pdf]

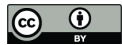

*Supplement of*

**Discriminating viscous-creep features (rock glaciers) in mountain permafrost from debris-covered glaciers – a commented test at the Gruben and Yerba Loca sites, Swiss Alps and Chilean Andes**

**Wilfried Haeberli et al.**

*Correspondence to:* Wilfried Haeberli ([wilfried.haeberli@geo.uzh.ch](mailto:wilfried.haeberli@geo.uzh.ch))

- [tc-18-1669-2024-supplement-title-page.pdf](#)
- [Haeberli et al\\_Supplement.docx](#)

The copyright of individual parts of the supplement might differ from the article licence.
